# Supplementary material for: MAP3K1 mutations confer tumor immune heterogeneity in hormone receptor–positive HER2-negative breast cancer
Source: PubMed Central journal article supplement (PMC11735090; doi:10.1172/jci183656), 2024-11-12

MEKK1 for Supplemental Figure 2A

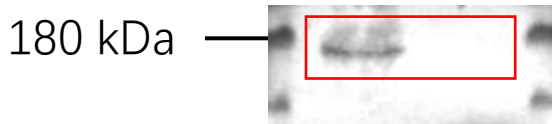

FLAG for Supplemental Figure 2B

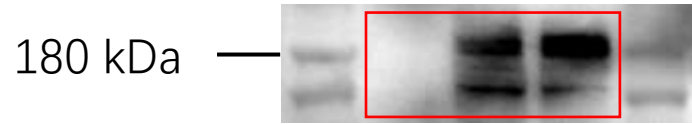

GAPDH for Supplemental Figure 2A

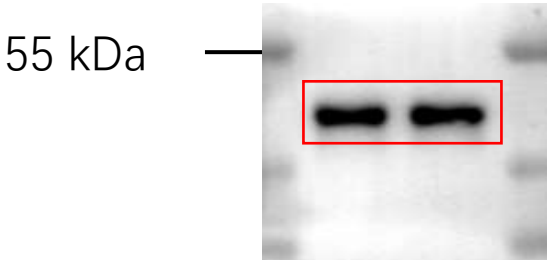

GAPDH for Supplemental Figure 2B

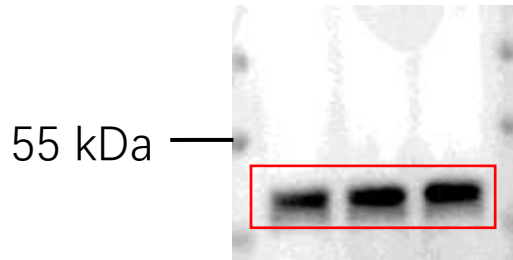

TAP1 for Supplemental Figure 6B

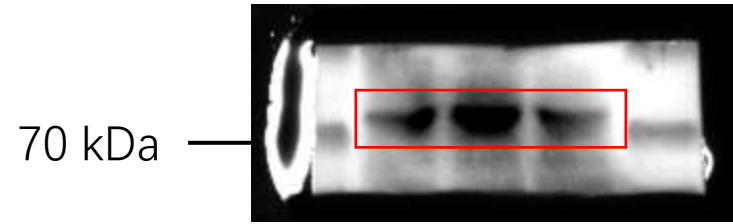

TAP2 for Supplemental Figure 6B

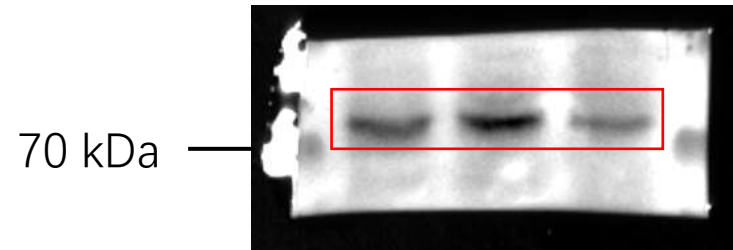

GAPDH for Supplemental Figure 6B

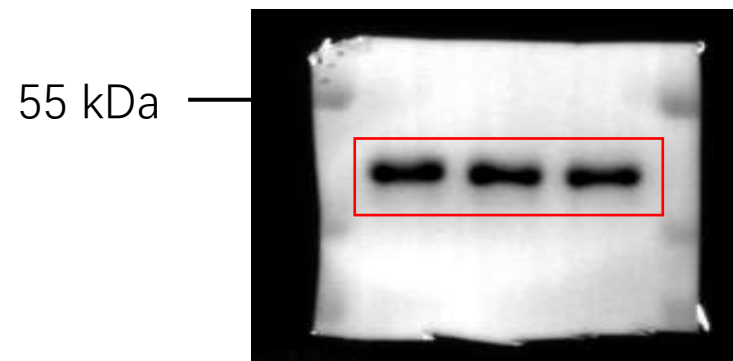

DDX17 for Figure 5C

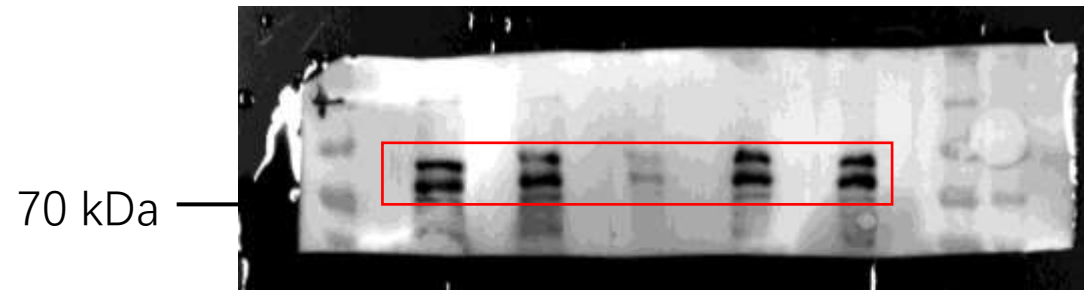

DDX17 for Figure 5D

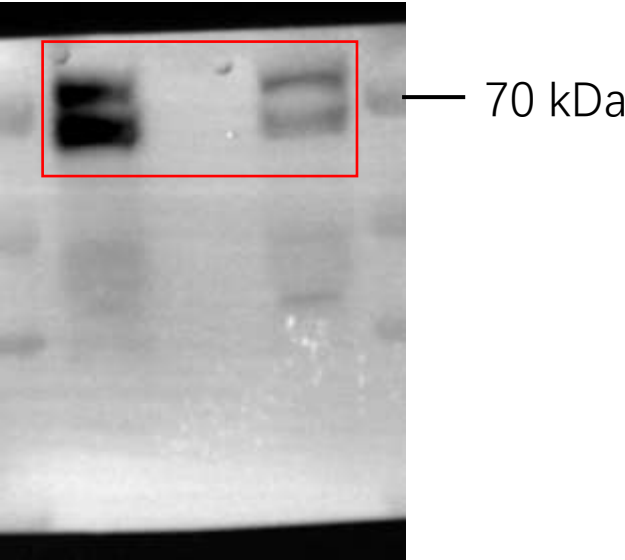

DDX17 for Figure 5D input

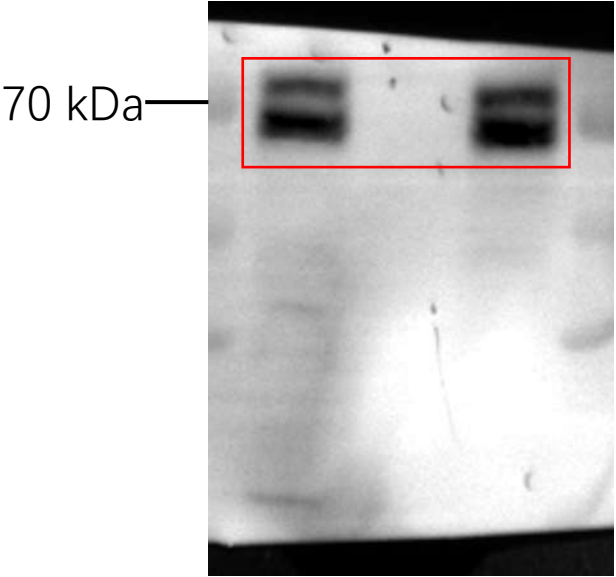

FLAG for Figure 5D

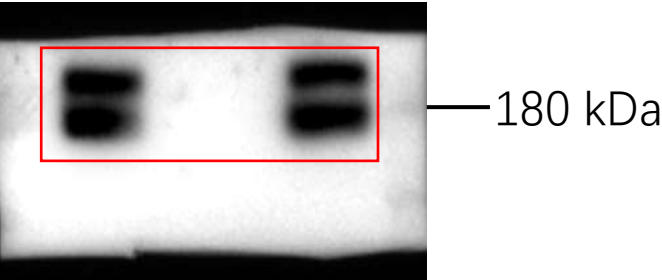

FLAG for Figure 5D input

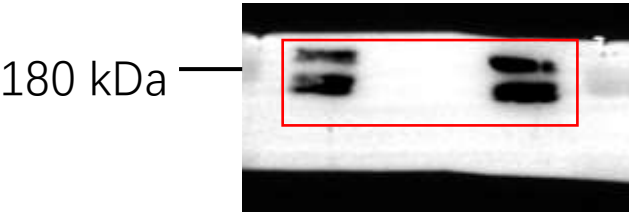

TAP1 for Supplemental Figure 8B

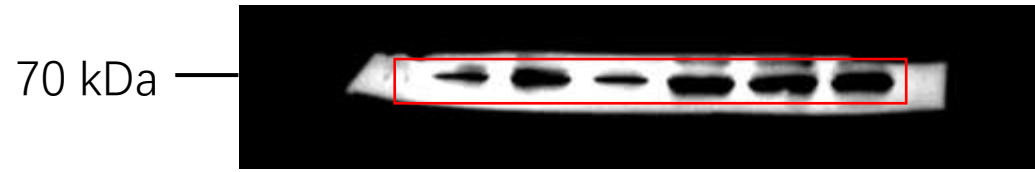

TAP2 for Supplemental Figure 8B

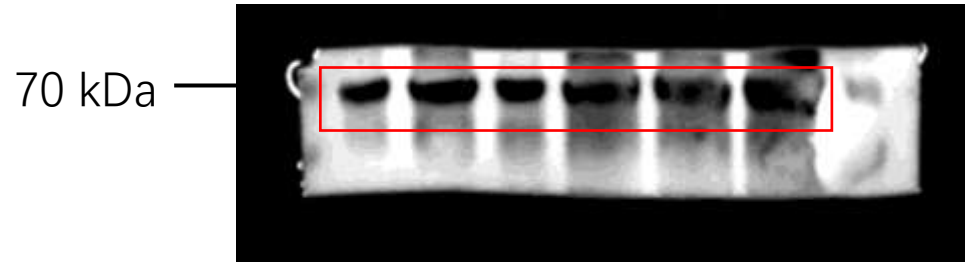

GAPDH for Supplemental Figure 8B

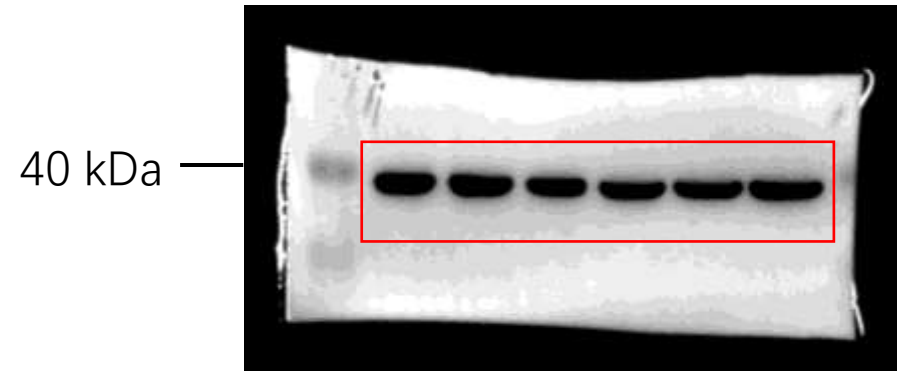

Supplement: jci-135-183656-s169.pdf [file jci-135-183656-s169.pdf]
