# Supplementary material for: MAP3K1 mutations confer tumor immune heterogeneity in hormone receptor–positive HER2-negative breast cancer
Source: PubMed Central journal article supplement (PMC11735090; doi:10.1172/jci183656), 2024-11-12
Supplement: jci-135-183656-s168.pdf [file jci-135-183656-s168.pdf]

## Supplemental Figures 1-10

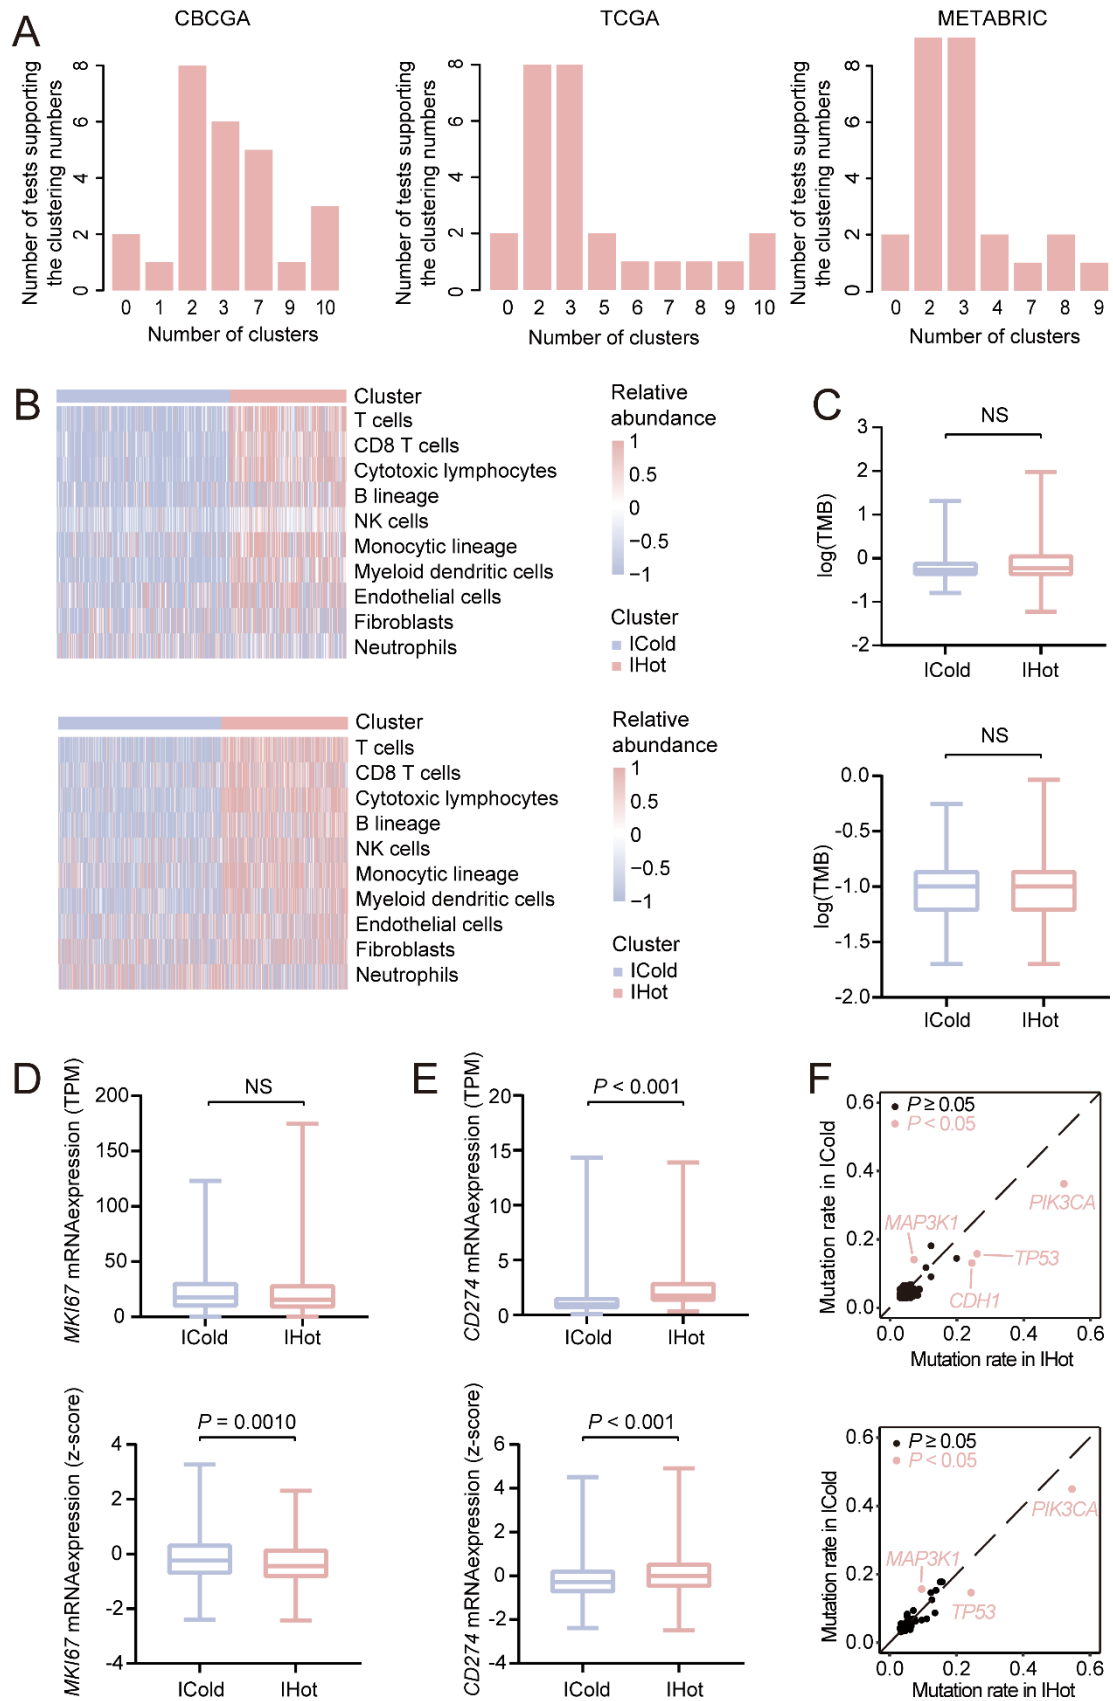

Supplemental Figure 1. *MAP3K1* mutation is closely correlated with immune

**microenvironment heterogeneity in HR<sup>+</sup>/HER2<sup>-</sup> breast cancer.**

(A) Number of clusters chosen by 26 criteria provided by “NbClust”.

(B) Heatmap showing the relative abundance of immune and stromal cells calculated by MCP-Counter in each HR<sup>+</sup>/HER2<sup>-</sup> breast cancer sample in TCGA (top panel; n = 550) and METABRIC (bottom panel; n = 1222) cohorts. The two immunological subtypes were annotated.

(C) Comparison of tumor mutation burden (TMB) of HR<sup>+</sup>/HER2<sup>-</sup> breast tumors with the ICold and IHot subtypes in TCGA (top panel; n = 475) and METABRIC (bottom panel; n = 611) cohorts. The center line represents the median.

(D) Comparison of mRNA expression of *MKI67* in HR<sup>+</sup>/HER2<sup>-</sup> breast tumors with the ICold and IHot subtypes in TCGA (top panel; n = 543) and METABRIC (bottom panel; n = 1042) cohorts. The center line represents the median.

(E) Comparison of mRNA expression of *CD274* in HR<sup>+</sup>/HER2<sup>-</sup> breast tumors with the ICold and IHot subtypes in TCGA (top panel; n = 543) and METABRIC (bottom panel; n = 1042) cohorts. The center line represents the median.

(F) Mutation prevalence of cancer-related genes in TCGA (top panel; n = 475) and METABRIC (bottom panel; n = 611) cohorts.

Statistical analysis: (C-E) Wilcoxon signed-rank test; (F) Fisher’s exact test. ICold, immune cold subtype; IHot, immune hot subtype; HR, hormone receptor; TMB, tumor mutation burden; HER2, human epidermal growth factor receptor 2.

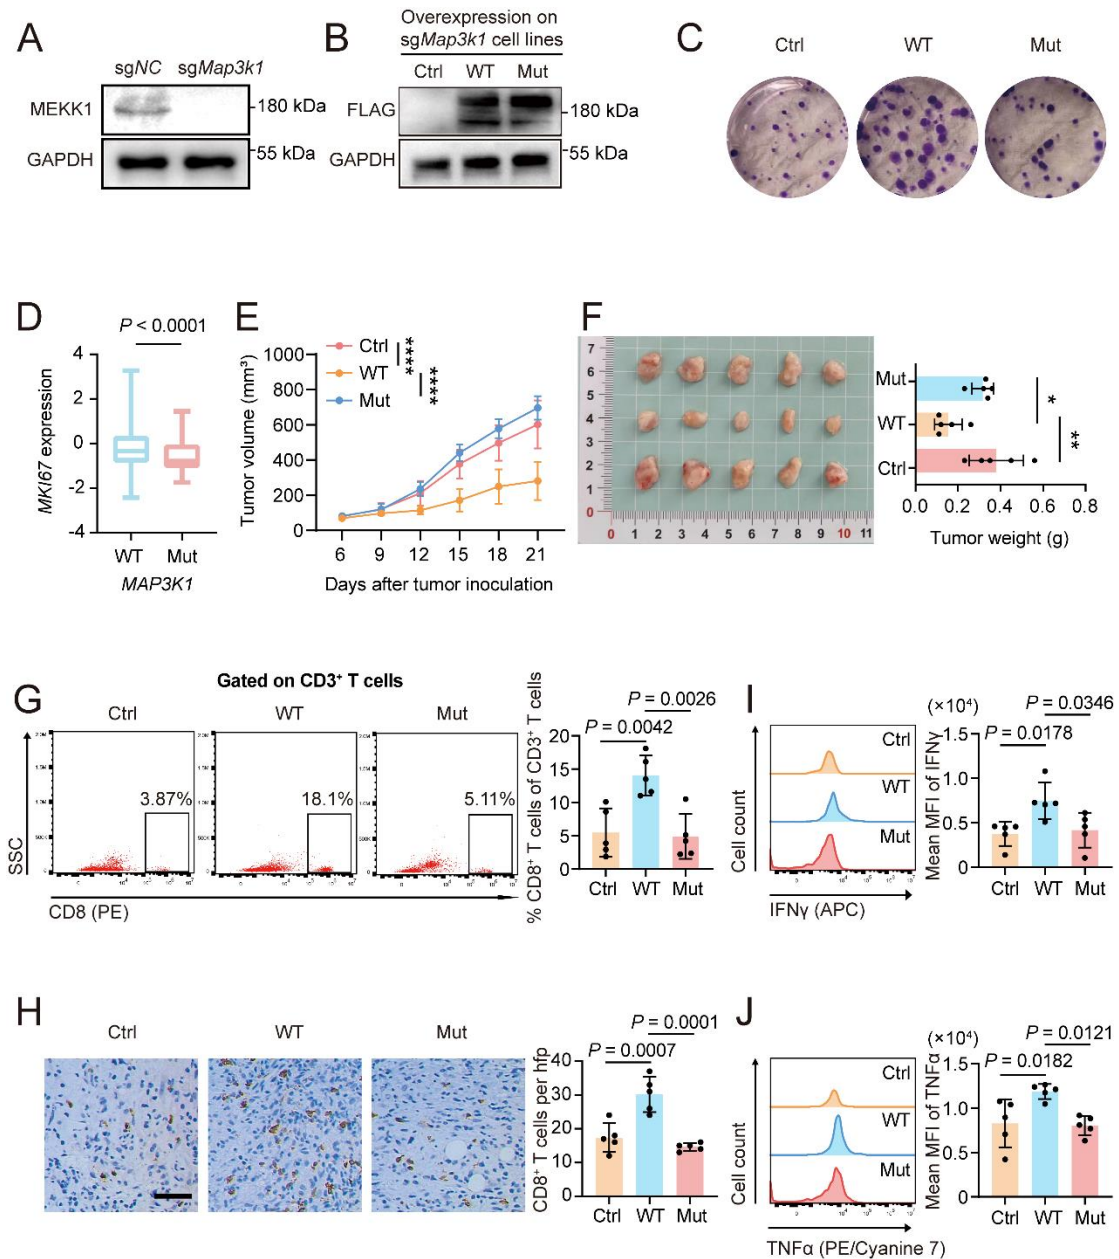

**Supplemental Figure 2. *MAP3K1*-mutant tumors evade CD8<sup>+</sup> T cell-mediated immunity in vivo. Related to Figure 2.**

(A) *Map3k1* KO efficacy in 67NR mouse breast cancer cell lines was examined by western blot.

(B) *Map3k1* KO 67NR cell lines were stably transfected with *Map3k1*-WT (WT) and *Map3k1*-Mut (Mut) or their control vector (Ctrl). The expression of MEKK1 was confirmed by western blot.

(C) Tumor cells in (B) were used for colony formation assay and the representative images are shown here.

**(D)** Comparison of the mRNA expression of *MKI67* in *MAP3K1*-WT and *MAP3K1*-Mut tumors (n = 719) in METABRIC cohort. The center line represents the median.

**(E and F)** EMT6 mouse breast cancer cells with varying *Map3k1* status were orthotopically injected into BALB/c mice (n = 5 per group). Tumor growth curves **(C)** and tumor weights with the images **(D)** are shown.

**(G)** Representative flow cytometry data of CD8<sup>+</sup> T cell infiltration gated on CD3<sup>+</sup> T cells in tumor tissues.

**(H)** Representative IHC images of tumor tissues are shown and the numbers of CD8<sup>+</sup> T cell are quantified. Scale bar, 50 μm.

**(I and J)** MFI of IFNγ **(I)** and TNFα **(J)** in CD8<sup>+</sup> T cells in the tumor tissues.

Data are mean ± SD **(E-J)** (n = 5 per group). Statistical analysis: **(D)** Wilcoxon signed-rank test; **(E)** two-way ANOVA with Tukey's test; **(F-J)** one-way ANOVA with Tukey's test. Significance in tumor growth **(E)** and tumor weight **(F)** data is annotated: \**P* < 0.05, \*\**P* < 0.01, \*\*\**P* < 0.001, \*\*\*\**P* < 0.0001.

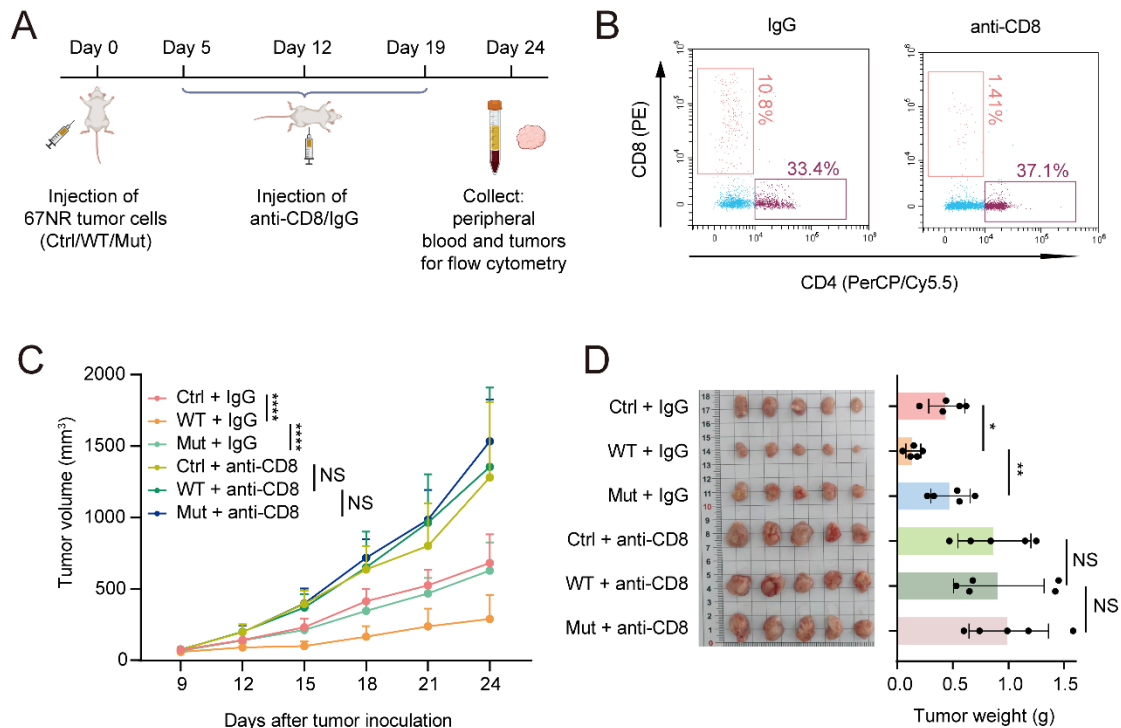

**Supplemental Figure 3. *MAP3K1*-mutant tumors evade CD8<sup>+</sup> T cell-mediated immunity in vivo. Related to Figure 2.**

(A-D) Schematic diagram showing the CD8 neutralizing experiment (A). BALB/c mice were orthotopically injected with 67NR cells with varying *Map3k1* status on day 0 and then were injected with a CD8 neutralizing antibody or its isotype control (IgG) at the indicated time points (n = 5 per group). Peripheral blood was collected to examine depletion of CD8 (B). Tumor growth curves (C) and tumor weights with the images (D) are shown.

Data are mean  $\pm$  SD (C and D) (n = 5 per group). Statistical analysis: (C) two-way ANOVA with Tukey's test; (D) one-way ANOVA with Tukey's test. Significance in tumor growth (C) and tumor weight (D) data is annotated: \* $P < 0.05$ , \*\* $P < 0.01$ , \*\*\* $P < 0.001$ , \*\*\*\* $P < 0.0001$ .

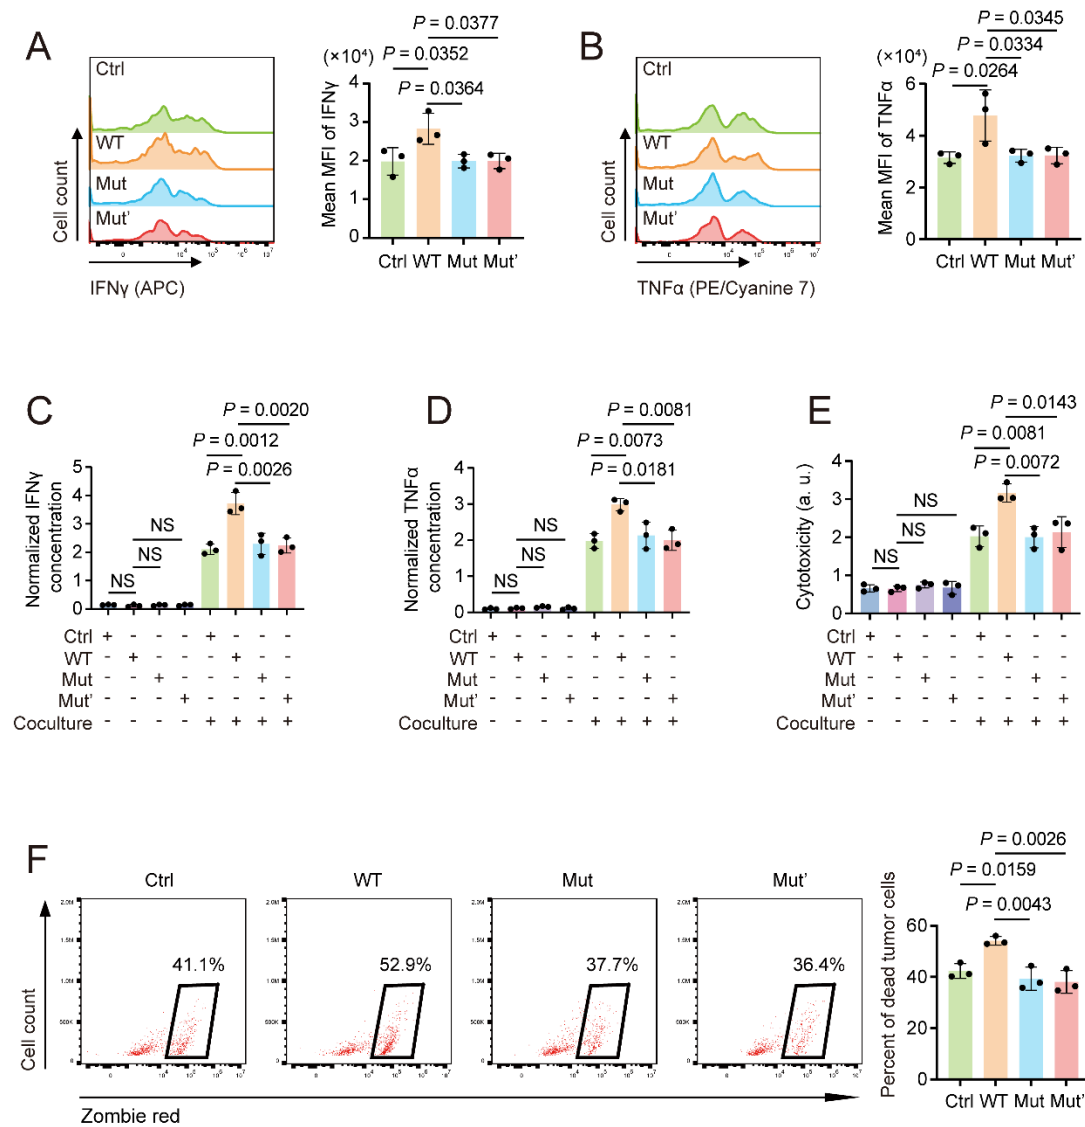

**Supplemental Figure 4. *MAP3K1* mutation inhibits CD8<sup>+</sup> T cells activation in vitro.**

**Related to Figure 3.**

(A and B) EMT6-OVA cells with varying *Map3k1* status were cocultured with OT-I splenocytes for 24 hours. MFI of IFN $\gamma$  (A) and TNF $\alpha$  (B) in CD8<sup>+</sup> T cells after coculture are shown.

(C and D) Concentration of cytokines IFN $\gamma$  (C) and TNF $\alpha$  (D) in the culture medium of the above EMT6-splenocytes coculture system was measured by ELISA.

(E) T cell cytotoxicity in the 67NR-splenocytes coculture system was measured by lactate dehydrogenase (LDH) assay.

(F) T cell cytotoxicity was assessed by the percentage of dead cells in EpCAM<sup>+</sup> tumor cells in the EMT6-splenocytes coculture system.

Data are mean  $\pm$  SD (A-F) (n = 3 per group). Statistical analysis: (A-F) one-way

ANOVA with Tukey's test.

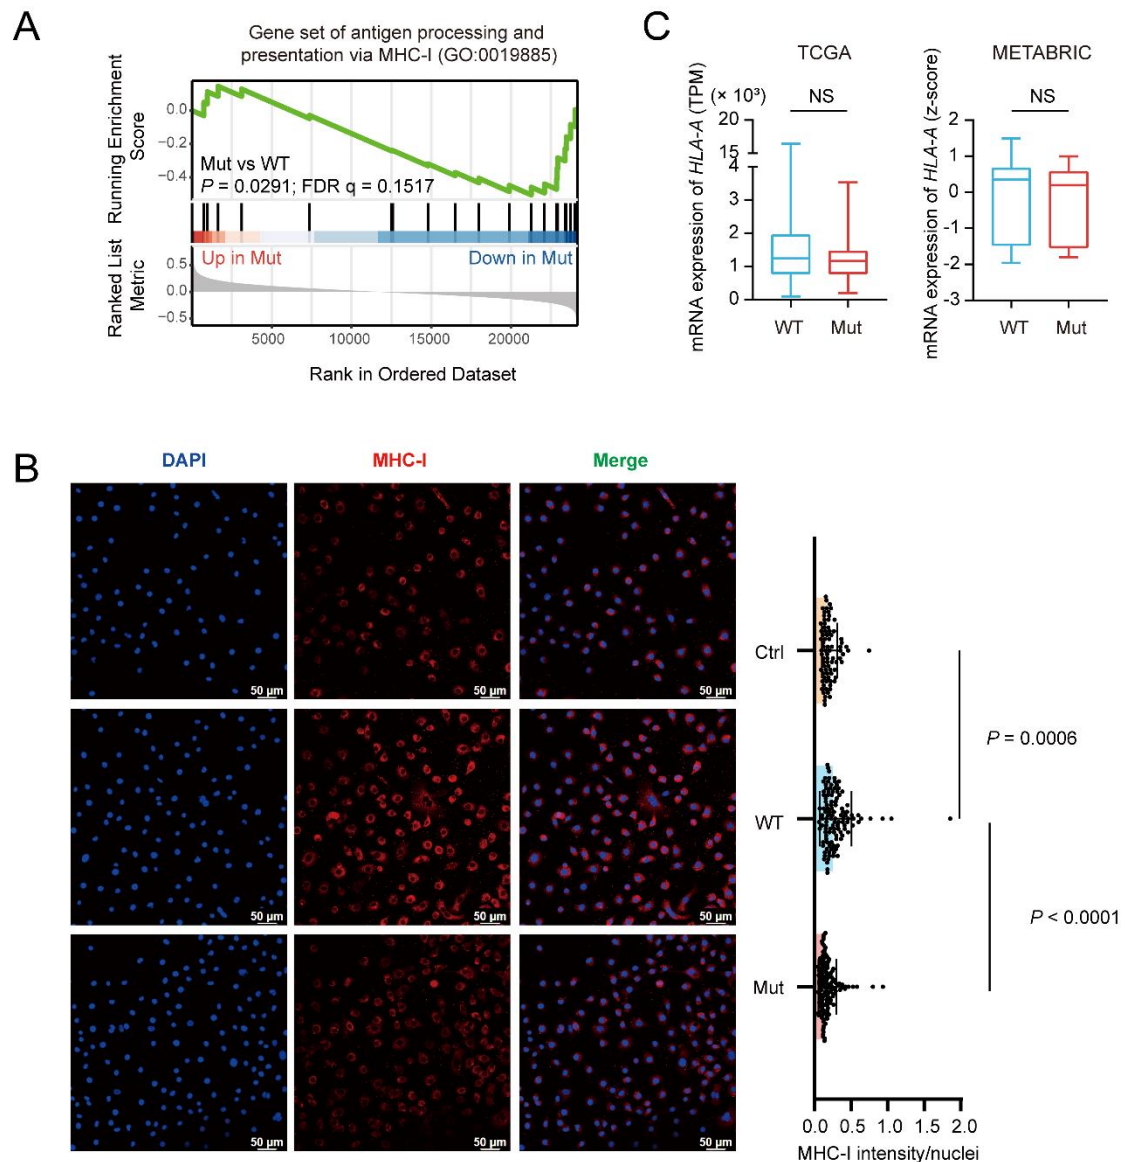

**Supplemental Figure 5. *MAP3K1* mutation suppresses tumor antigen presentation.**

**Related to Figure 4.**

(A) Representative gene set enrichment analysis plot showing downregulated antigen processing and presentation via MHC-I pathway in patients with *MAP3K1* mutation versus those without in METABRIC cohort. Significance was determined as  $P$  value less than 0.05 and FDR  $q$  value less than 0.25.

(B) EMT6 tumor cells with varying *Map3k1* status were cocultured with OT-I splenocytes for 24 hours. Surface expression of MHC-I on tumor cells was measured by immunofluorescence. Scale bar: 50  $\mu$ m.

(C) Comparison of mRNA expression of *HLA-A* in *MAP3K1*-WT and *MAP3K1*-Mut tumors in TCGA ( $n = 481$ , left panel) and METABRIC ( $n = 719$ , right panel) cohorts.



The center line represents the median.

Statistical analysis: (C) Wilcoxon signed-rank test. FDR, false discovery rate.

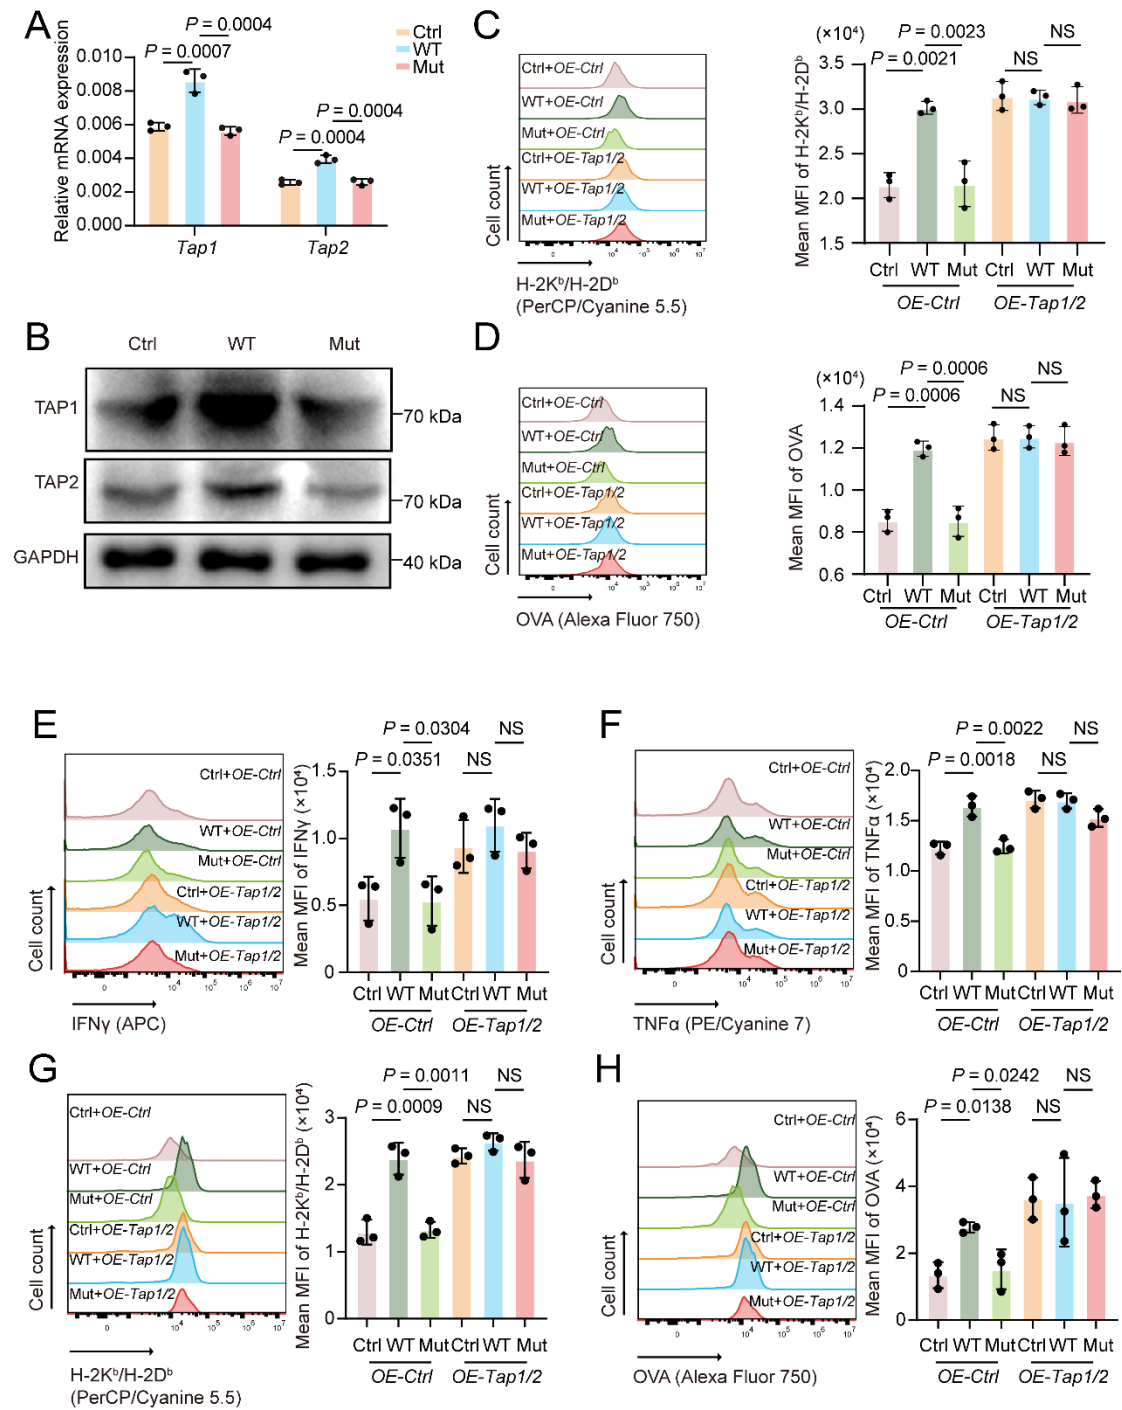

**Supplemental Figure 6. *MAP3K1* mutation suppresses tumor antigen presentation.**

**Related to Figure 4.**

(A) At 24 hours after coculture with OT-I splenocytes, 67NR-OVA cells with varying *Map3k1* status were collected to perform real-time quantitative polymerase chain reaction (RT-qPCR) analysis to test the RNA expression of *Tap1/2*.

(B) Tumors cells in (A) were also collected for western blot.

(C and D) OVA-expressing 67NR tumor cells with varying *Map3k1* status were

transiently transfected with *Tap1* and *Tap2* overexpression plasmids (OE-*Tap1/2*) or its control vector (OE-*Ctrl*). One day after transfection, tumor cells were cocultured with OT-I splenocytes for 24 hours. Surface expression of H-2K<sup>b</sup>/H-2D<sup>b</sup> (**C**) and OVA (**D**) on tumor cells were then measured by flow cytometry.

(**E-H**) EMT6-OVA cells with varying *Map3k1* status were transiently transfected with *Tap1* and *Tap2* overexpression plasmids (OE-*Tap1/2*) or its control vector (OE-*Ctrl*). One day after transfection, tumor cells were cocultured with OT-I splenocytes for 24 hours. Expression of IFN $\gamma$  (**E**) and TNF $\alpha$  (**F**) in CD45<sup>+</sup> OT-I splenocytes and surface expression of H-2K<sup>b</sup>/H-2D<sup>b</sup> (**G**) and OVA (**H**) on CD45<sup>-</sup> tumor cells were measured by flow cytometry.

Data are mean  $\pm$  SD (**A**, **C**, **D**, and **E-H**) (n = 3 per group). Statistical analysis: (**A**, **C**, **D**, and **E-H**) one-way ANOVA with Tukey's test.

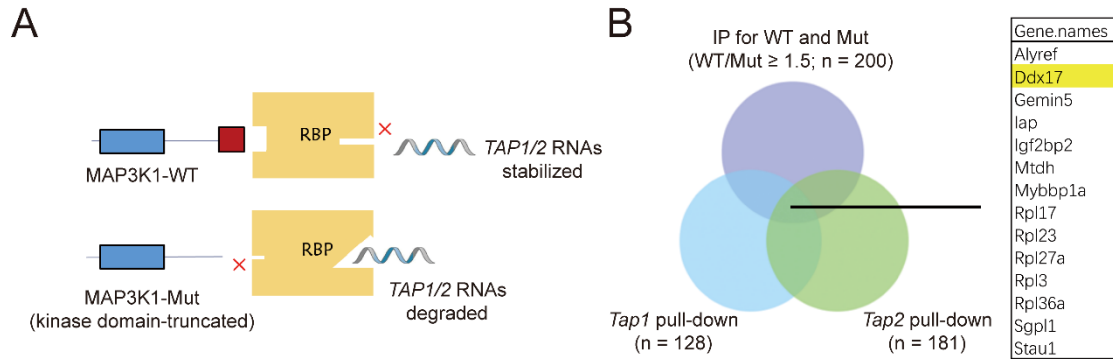

**Supplemental Figure 7. *Map3k1* mutation promotes *Tap1/2* RNAs degradation.**

**Related to Figure 5.**

**(A)** Schematic diagram of *MAP3K1*-Mut promoting *TAP1/2* RNAs degradation. *MAP3K1*-WT could bind to and induce a conformational change in an RNA binding protein (RBP), and thus weakens the ability of the RBP to bind and degrade *TAP1/2* RNAs. *MAP3K1*-Mut lost this effect, resulting in an increase in *TAP1/2* degradation.

**(B)** IP with mass spectrometry assay was performed to identify proteins that bind more with *Map3k1*-WT than with *Map3k1*-Mut. RNA pull-down with mass spectrometry assay was performed to identify potential RBPs that bind to *Tap1/2* RNAs. The top proteins in intersect of these proteins are listed here.

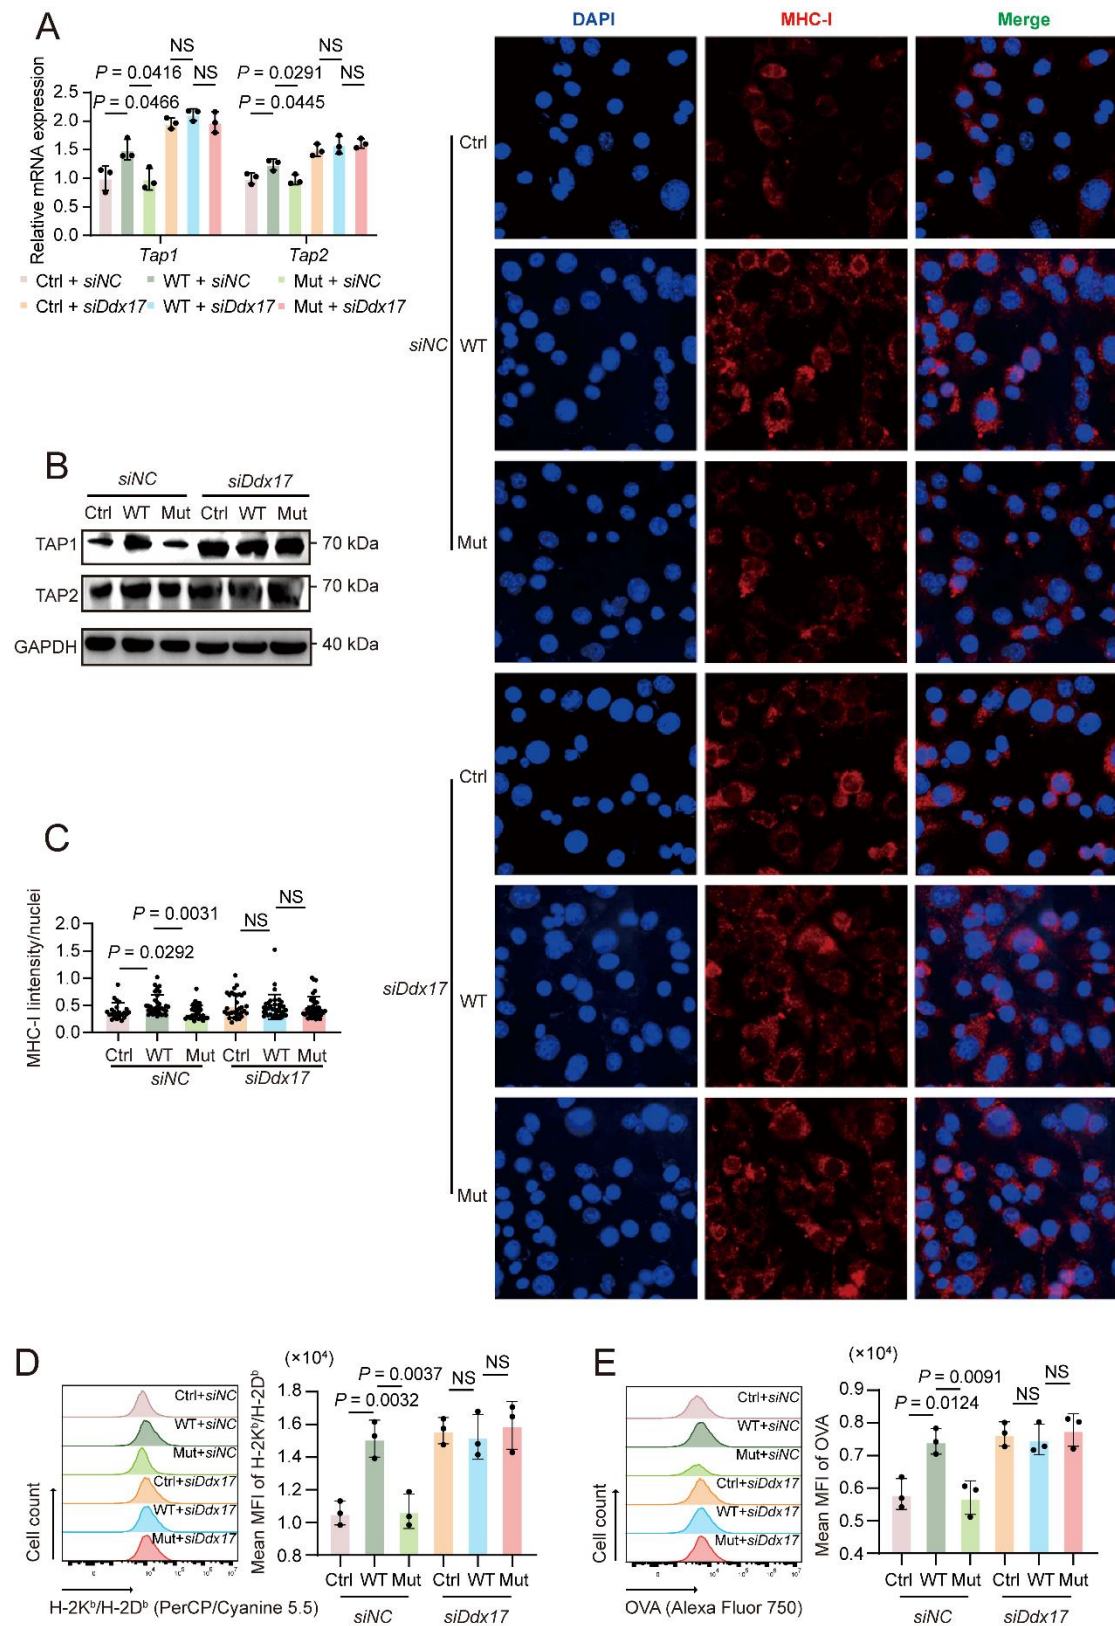

**Supplemental Figure 8. *Map3k1* mutation promotes *Tap1/2* RNAs degradation.**

**Related to Figure 5.**

(A) 67NR-OVA cells with varying *Map3k1* status were transiently transfected with

*siDdx17* or *siNC*. One day after transfection, tumor cells were cocultured with OT-I splenocytes for 24 hours. Tumor cells were then collected and RT-qPCR was performed to test the RNA level of *Tap1/2*.

**(B)** Tumor cells in **(A)** were also collected for western blot.

**(C)** Surface expression of MHC-I on tumor cells in **(A)** was measured by immunofluorescence. Scale bar: 50  $\mu\text{m}$ .

**(D and E)** Surface expression of H-2K<sup>b</sup>/H-2D<sup>b</sup> **(D)** and OVA **(E)** on tumor cells in **(A)** was also measured by flow cytometry.

Data are mean  $\pm$  SD **(A, D, E)** (n = 3 per group). Statistical analysis: **(A, C, D, E)** one-way ANOVA with Tukey's test.

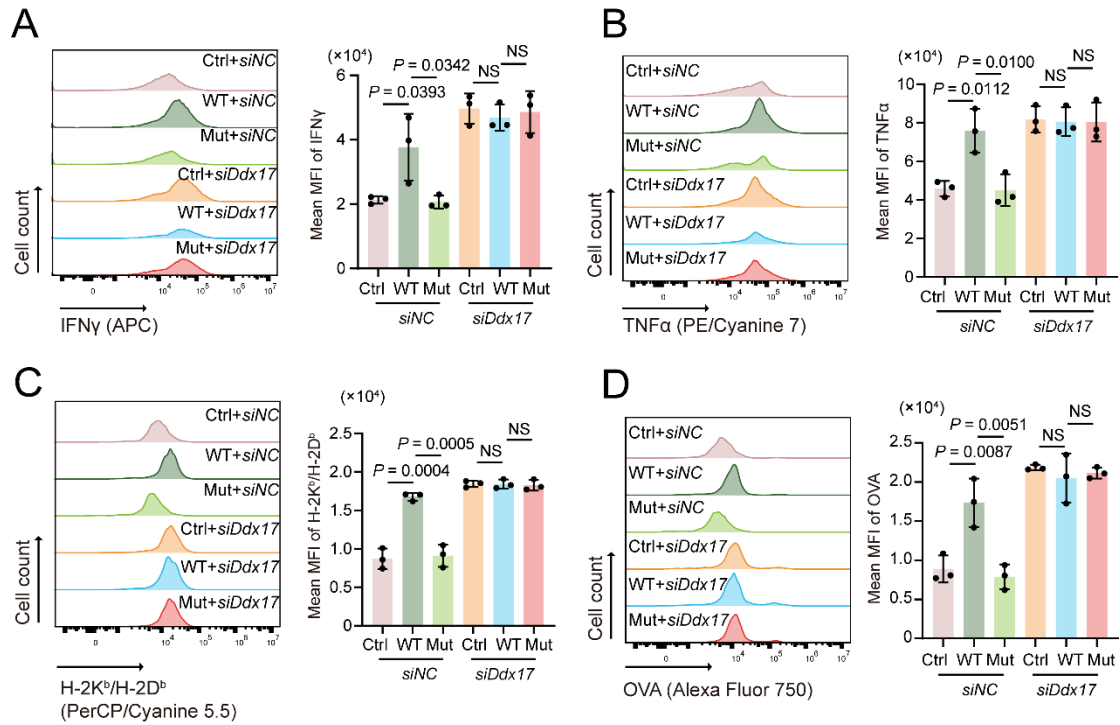

**Supplemental Figure 9. *Map3k1* mutation promotes *Tap1/2* RNAs degradation.**

**Related to Figure 5.**

(A-D) EMT6-OVA cells with varying *Map3k1* status were transiently transfected with small interfering RNA targeting *Ddx17* (*siDdx17*) or its control RNA (*siNC*). One day after transfection, tumor cells were cocultured with OT-I splenocytes for 24 hours. Expression of IFN $\gamma$  (A) and TNF $\alpha$  (B) in CD45<sup>+</sup> OT-I splenocytes and surface expression of H-2K<sup>b</sup>/H-2D<sup>b</sup> (C) and OVA (D) on CD45<sup>-</sup> tumor cells were measured by flow cytometry.

Data are mean  $\pm$  SD (A-D) ( $n = 3$  per group). Statistical analysis: (A-D) one-way ANOVA with Tukey's test. RBP, RNA binding protein.

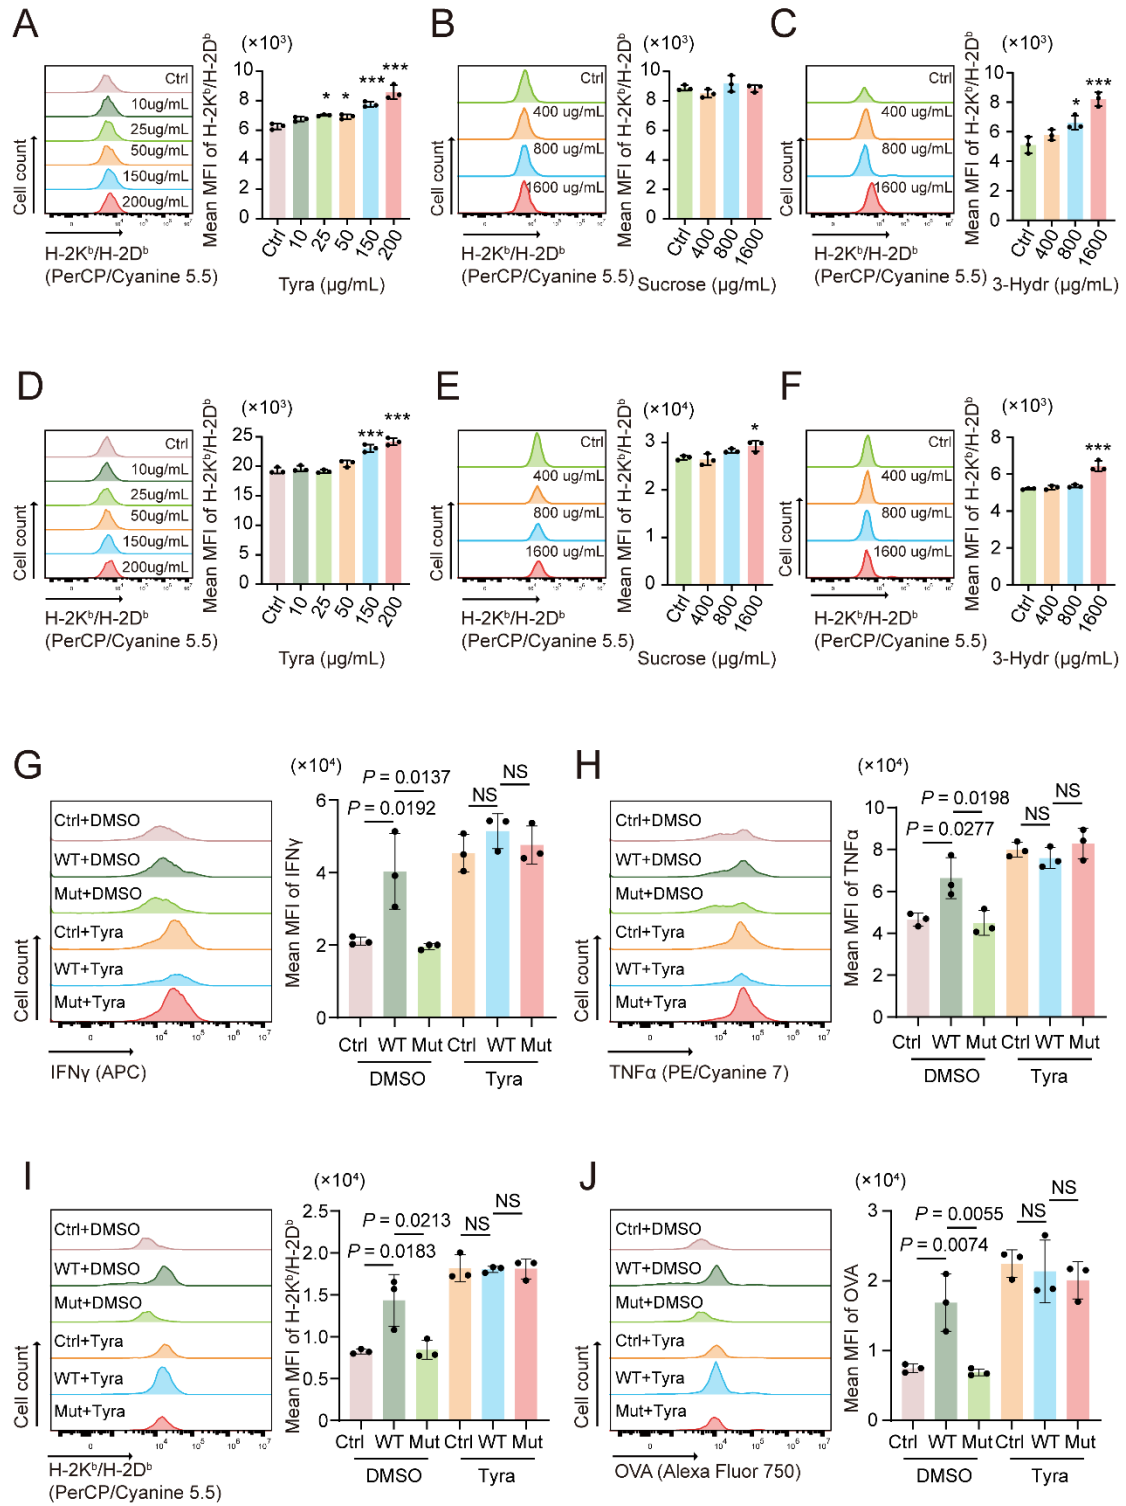

**Supplemental Figure 10. Tyramine augments the efficacy of immunotherapy in HR<sup>+</sup>/HER2<sup>-</sup> breast cancer. Related to Figure 6.**

(A-C) 67NR cells were incubated with different concentrations of Tyra (A), sucrose (B), and 3-Hydr (C) in vitro. Surface expression of H-2K<sup>b</sup>/H-2D<sup>b</sup> were measured by flow cytometry.



**(D-F)** EMT6 cells were incubated with different concentrations of Tyra **(D)**, sucrose **(E)**, and 3-Hydr **(F)** in vitro. Surface expression of H-2K<sup>b</sup>/H-2D<sup>b</sup> were measured by flow cytometry.

**(G-J)** 67NR-OVA cells with varying *Map3k1* status were cocultured with OT-I splenocytes in the presence of 200 µg/ml Tyra for 24 hours. Expression of IFN $\gamma$  **(G)** and TNF $\alpha$  **(H)** in CD45<sup>+</sup> OT-I splenocytes and surface expression of H-2K<sup>b</sup>/H-2D<sup>b</sup> **(I)** and OVA **(J)** on CD45<sup>-</sup> tumor cells were measured by flow cytometry.

Data are mean  $\pm$  SD **(A-J)** (n = 3 per group). Statistical analysis: **(A-F)** one-way ANOVA with Dunnett's test; **(G-J)** one-way ANOVA with Tukey's test. Significance in **(A-F)** is annotated: \* $P < 0.05$ , \*\* $P < 0.01$ , \*\*\* $P < 0.001$ , \*\*\*\* $P < 0.0001$ . Tyra, tyramine. Tyra, tyramine; 3-Hydr, 3-hydroxy-3-methylglutarate. HR, hormone receptor; HER2, human epidermal growth factor receptor 2.
